# Supplementary material for: The Effect of Physical and Chemical Cues on Hepatocellular Function and Morphology
Source: MDPI journal article supplement (doi:10.3390/ijms15034299), 2014-03-11

## Supplementary Information

**Figure S1.** Immunofluorescence staining of the hepatic functional protein, albumin (green excitation  $\lambda = 448$  nm), in HepG2 cells cultured on (A) RGD TiO<sub>2</sub>-nanograting pattern and (B) TiO<sub>2</sub>-nanograting pattern alone and (C) RGD-flat surface compared to cells cultured on (D) Flat surface alone (control).

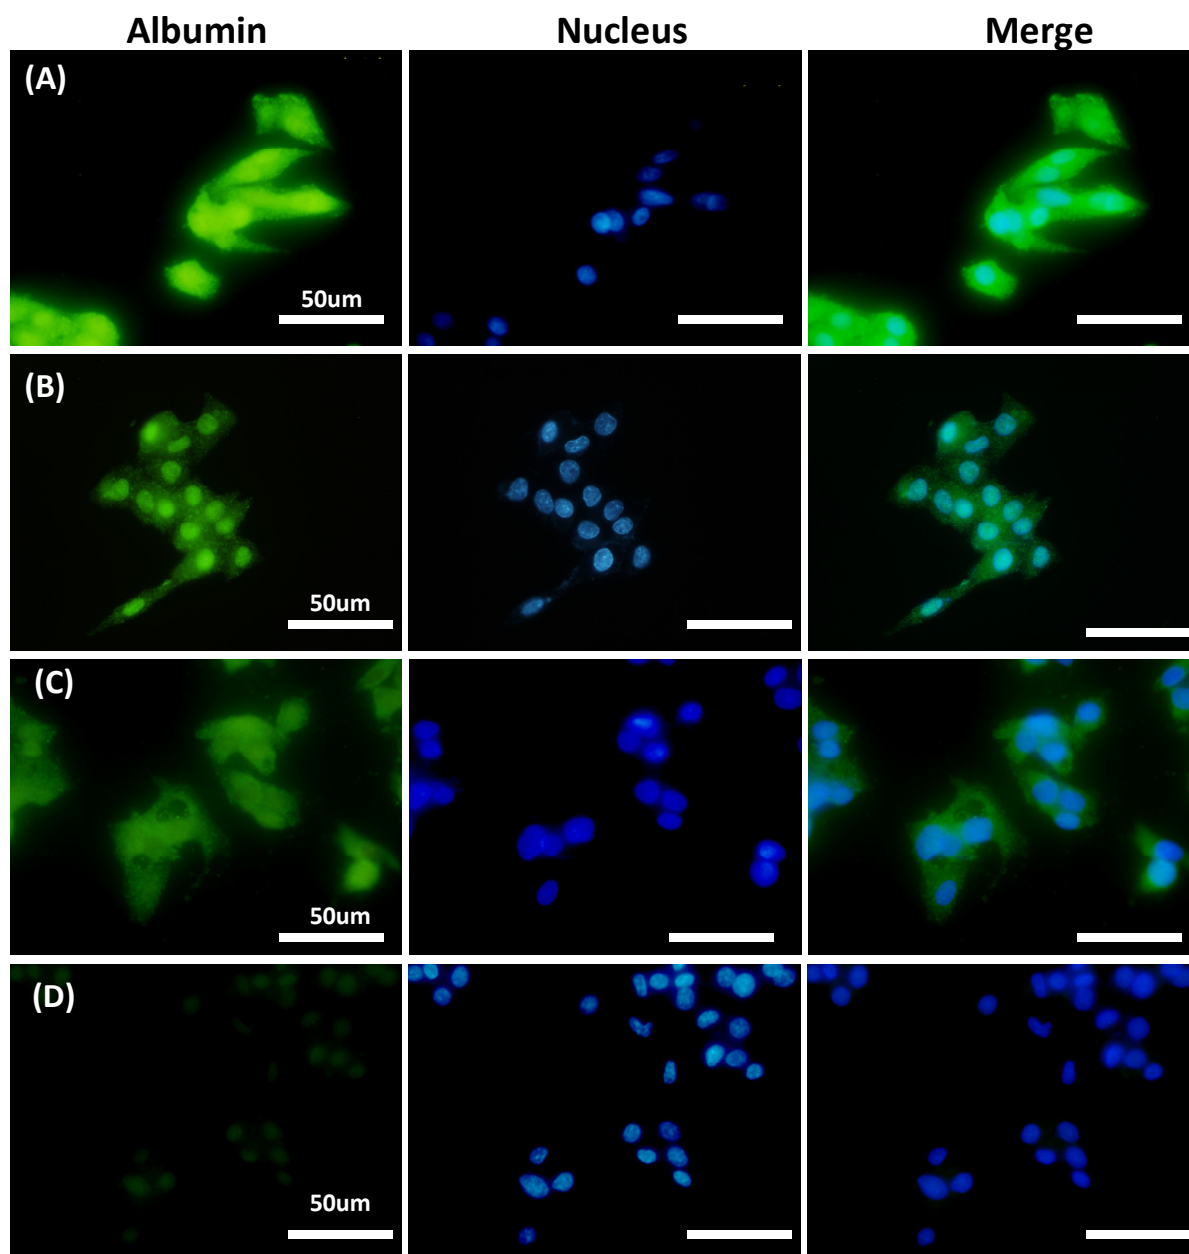

**Figure S2.** Immunofluorescence staining of the hepatic protein, transferrin (green excitation  $\lambda = 448$  nm), and nucleus (blue) in HepG2 cells cultured on (A) RGD TiO<sub>2</sub>-nanograting pattern and (B) TiO<sub>2</sub>-nanograting pattern compared to cells cultured on (C) RGD-flat surface and (D) Flat alone (control).

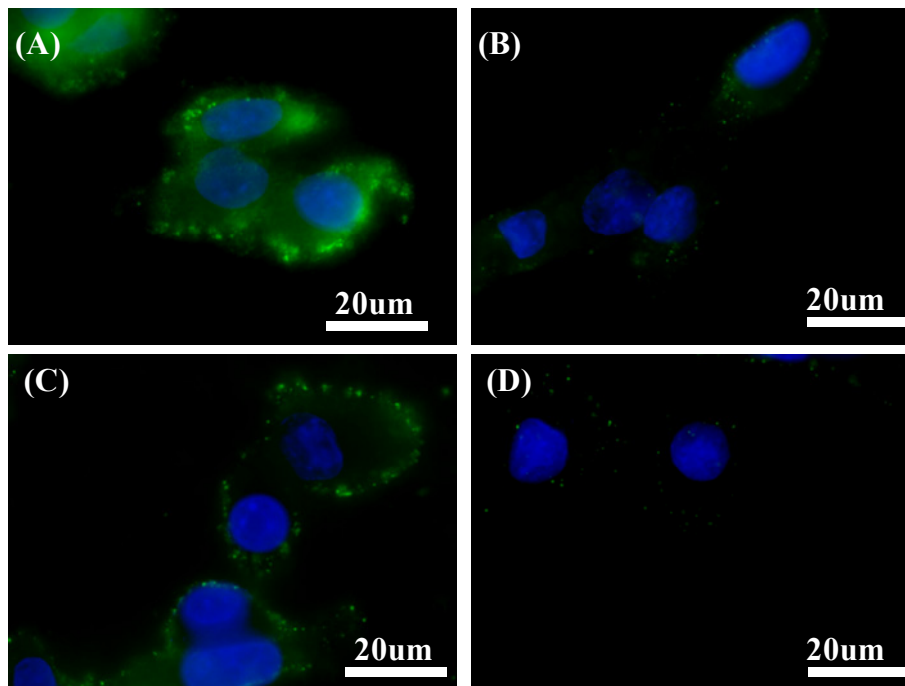

**Figure S3.** Immunofluorescence staining of the hepatic protein, cytochrome P450 (red excitation  $\lambda = 578$  nm), in HepG2 cells cultured on (A) RGD TiO<sub>2</sub>-nanograting pattern and (B) TiO<sub>2</sub>-nanograting pattern; (C) RGD-flat surface compared to cells cultured on (C) and (D) control, arrow head indicates the red fluorescence of cytochrome P450 2C.

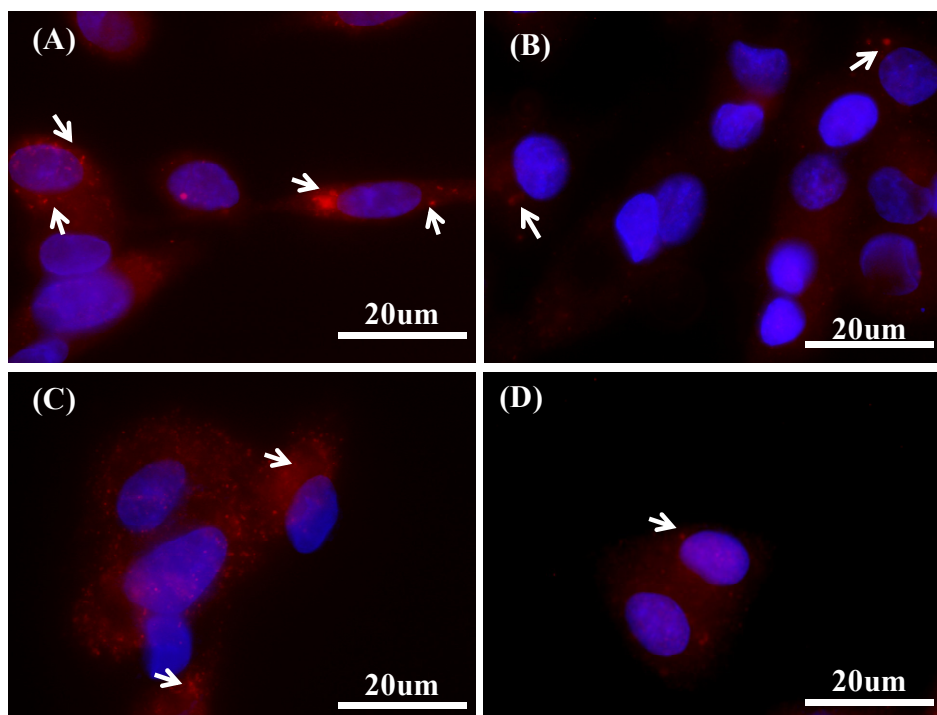

Supplement: s1 [file s1]
